# Supplementary material for: Bioinformatic and Molecular Analysis of Inverse Autotransporters from Escherichia coli
Source: PubMed Central journal article supplement (PMC6714894; doi:10.1128/msphere.00572-19), 2019-08-28
Supplement: mSphere.00572-19-sf004.pdf [file mSphere.00572-19-sf004.pdf]

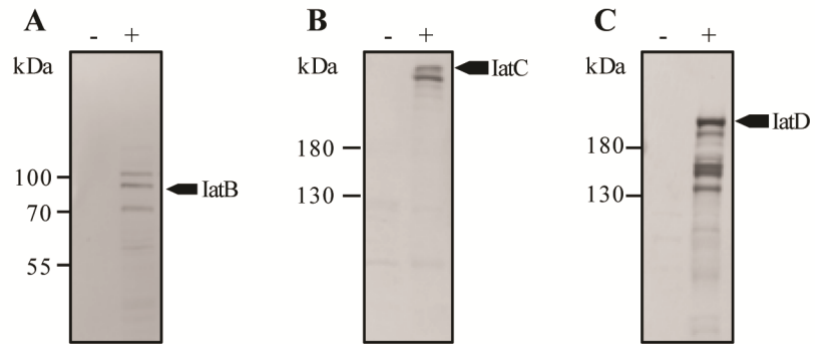

**Figure S4**
